# Supplementary material
Source: PubMed Central journal article supplement (PMC4624005)
Supplement: NIHMS716935-supplement-Supp_TableS1-S3___FigureS1-S2.pdf [file NIHMS716935-supplement-Supp_TableS1-S3___FigureS1-S2.pdf]

## SUPPLEMENTAL DATA

### Supplemental Figure 1. Study Schema, CCG-1961

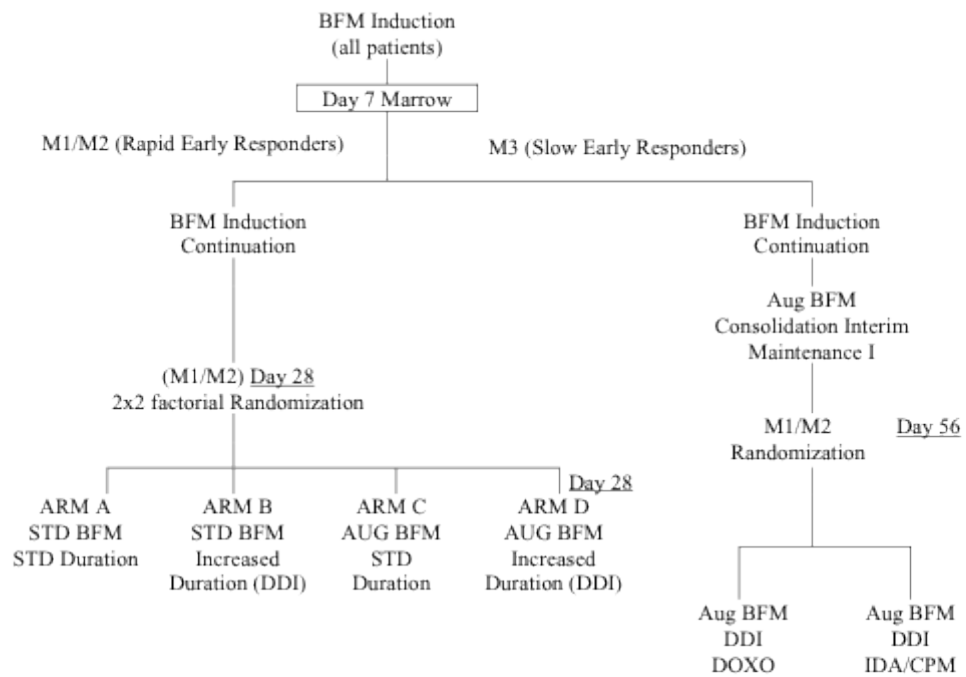

DDI = Double Delayed Intensification  
STD = Standard  
DOXO = Doxorubicin  
IDA = Idarubicin  
CPM = Cyclophosphamide

SUPPLEMENTAL DATA

Supplemental Figure 2. Study Schema, CCG-1991

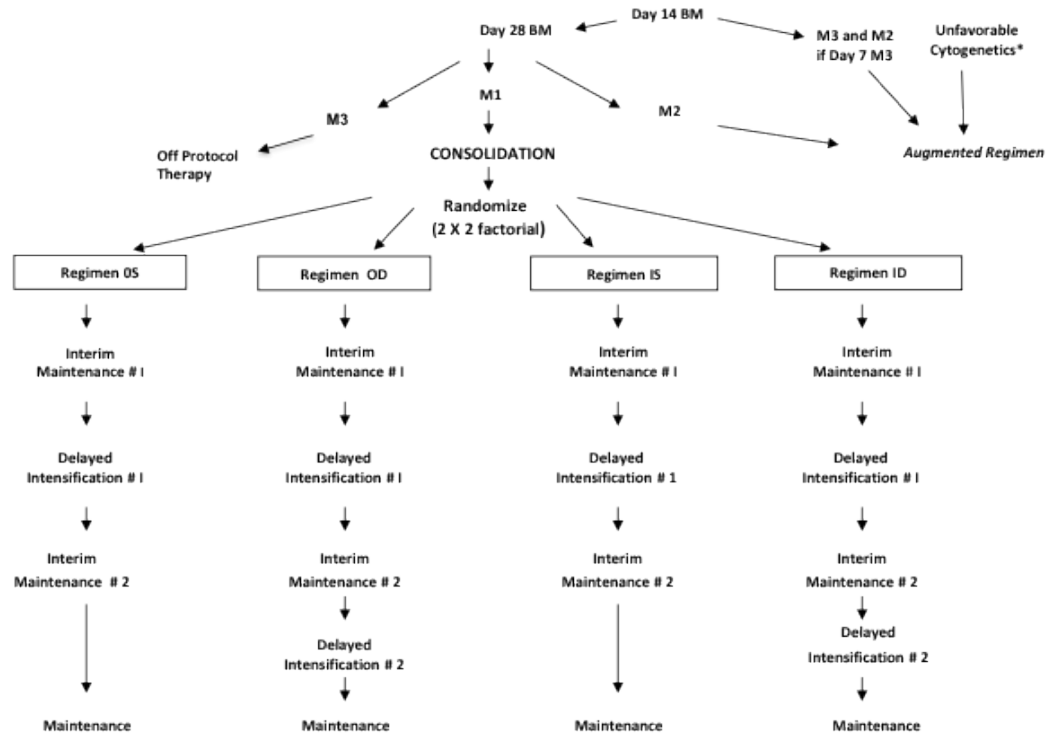

\* t(4;11)(q21;q23)(q34;q11), t(9;22), balanced t(1;19)(q23;p13), hypodiploidy with < 45 chromosomes.

**SUPPLEMENTAL DATA**

**Supplemental Table I. Proportion of patients who experienced grade 3 or 4 toxicities, toxicity related delay in therapy, or significant Infections by sex, CCG-1961**

| <b>Toxicity Site</b>                          | <b>Phase</b>  | <b>Female %</b> | <b>Male %</b> |
|-----------------------------------------------|---------------|-----------------|---------------|
| Any grade 3 or 4 toxicities                   | Induction     | 51.1            | 45.6          |
| Any grade 3 or 4 toxicities                   | Consolidation | 40.8            | 34.3          |
| Any grade 3 or 4 toxicities                   | IM 1          | 29.0            | 24.3          |
| Any grade 3 or 4 toxicities                   | DI 1          | 35.9            | 26.4          |
| Therapy delayed over a week due to toxicities | Induction     | 8.8             | 6.13          |
| Therapy delayed over a week due to toxicities | Consolidation | 50.07           | 46.62         |
| Therapy delayed over a week due to toxicities | IM 1          | 19.18           | 15.23         |
| Therapy delayed over a week due to toxicities | DI 1          | 53.79           | 52.69         |
| Significant infection <sup>†</sup>            | Induction     | 22.29           | 16.83         |
| Significant infection <sup>†</sup>            | Consolidation | 16.73           | 16.81         |
| Significant infection <sup>†</sup>            | IM 1          | 8.3             | 6.59          |
| Significant infection <sup>†</sup>            | DI 1          | 20.17           | 16.03         |
| Liver                                         | Induction     | 16.75           | 16.50         |
| Liver                                         | Consolidation | 17.65           | 14.77         |
| Liver                                         | IM 1          | 11.02           | 10.96         |
| Liver                                         | DI 1          | 9.87            | 8.70          |
| Pancreas                                      | Induction     | 23.13           | 16.42         |
| Pancreas                                      | Consolidation | 3.27            | 2.58          |
| Pancreas                                      | IM 1          | 1.90            | 1.11          |
| Pancreas                                      | DI 1          | 4.15            | 3.81          |
| Pancreas: glucose                             | Induction     | 21.69           | 15.44         |
| Pancreas: glucose                             | Consolidation | 2.35            | 1.96          |
| Pancreas: glucose                             | IM 1          | 1.22            | 0.74          |
| Pancreas: glucose                             | DI 1          | 3.72            | 3.13          |
| Pancreas: other                               | Induction     | 2.17            | 1.31          |
| Pancreas: other                               | Consolidation | 1.44            | 0.98          |
| Pancreas: other                               | IM 1          | 0.82            | 0.56          |
| Pancreas: other                               | DI 1          | 0.57            | 0.68          |
| Renal/Genitourinary                           | Induction     | 4.58            | 4.17          |
| Renal/Genitourinary                           | Consolidation | 0.39            | 0.89          |
| Renal/Genitourinary                           | IM 1          | 0.68            | 0.28          |
| Renal/Genitourinary                           | DI 1          | 1.57            | 0.98          |
| Gastrointestinal                              | Induction     | 7.71            | 5.96          |
| Gastrointestinal                              | Consolidation | 10.07           | 6.58          |
| Gastrointestinal                              | IM 1          | 13.20           | 9.29          |
| Gastrointestinal                              | DI 1          | 8.87            | 5.18          |
| Pulmonary                                     | Induction     | 5.18            | 4.49          |
| Pulmonary                                     | Consolidation | 1.57            | 1.16          |
| Pulmonary                                     | IM 1          | 1.09            | 0.56          |
| Pulmonary                                     | DI 1          | 1.43            | 0.98          |
| Cardiac                                       | Induction     | 4.34            | 3.92          |
| Cardiac                                       | Consolidation | 0.92            | 1.42          |
| Cardiac                                       | IM 1          | 0.41            | 0.74          |
| Cardiac                                       | DI 1          | 1.43            | 0.98          |

| <b>Toxicity Site</b>      | <b>Phase</b>  | <b>Female %</b> | <b>Male %</b> |
|---------------------------|---------------|-----------------|---------------|
| Nervous system            | Induction     | 4.58            | 3.27          |
| Nervous system            | Consolidation | 8.10            | 5.78          |
| Nervous system            | IM 1          | 5.17            | 3.44          |
| Nervous system            | DI 1          | 7.01            | 4.59          |
| Peripheral nervous system | Induction     | 2.41            | 1.72          |
| Peripheral nervous system | Consolidation | 5.10            | 3.63          |
| Peripheral nervous system | IM 1          | 3.67            | 2.23          |
| Peripheral nervous system | DI 1          | 5.15            | 2.35          |
| Central nervous system    | Induction     | 2.53            | 1.72          |
| Central nervous system    | Consolidation | 4.84            | 2.76          |
| Central nervous system    | IM 1          | 2.04            | 1.49          |
| Central nervous system    | DI 1          | 2.52            | 2.54          |
| Skin                      | Induction     | 0.60            | 0.98          |
| Skin                      | Consolidation | 2.35            | 2.31          |
| Skin                      | IM 1          | 1.90            | 1.58          |
| Skin                      | DI 1          | 1.14            | 1.37          |
| Allergy                   | Induction     | 0.24            | 0.25          |
| Allergy                   | Consolidation | 1.18            | 1.69          |
| Allergy                   | IM 1          | 1.36            | 1.02          |
| Allergy                   | DI 1          | 0.57            | 0.29          |
| Coagulation               | Induction     | 10.60           | 11.60         |
| Coagulation               | Consolidation | 1.96            | 1.42          |
| Coagulation               | IM 1          | 0.41            | 0.93          |
| Coagulation               | DI 1          | 2.43            | 3.03          |
| Electrolytes              | Induction     | 6.02            | 7.68          |
| Electrolytes              | Consolidation | 1.31            | 1.33          |
| Electrolytes              | IM 1          | 0.54            | 0.56          |
| Electrolytes              | DI 1          | 1.72            | 0.59          |
| Fever                     | Induction     | 1.33            | 0.25          |
| Fever                     | Consolidation | 0.26            | 0.44          |
| Fever                     | IM 1          | 0.14            | 0.37          |
| Fever                     | DI 1          | 0.86            | 0.59          |
| Local                     | Induction     | 0.36            | 0.49          |
| Local                     | Consolidation | 0.39            | 0.18          |
| Local                     | IM 1          | 0.54            | 0.28          |
| Local                     | DI 1          | 0.57            | 0.10          |
| Mood                      | Induction     | 1.20            | 0.98          |
| Mood                      | Consolidation | 1.31            | 0.62          |
| Mood                      | IM 1          | 0.68            | 0.46          |
| Mood                      | DI 1          | 1.57            | 0.39          |
| Vision                    | Induction     | 0.12            | 0             |
| Vision                    | Consolidation | 0.13            | 0             |
| Vision                    | IM 1          | 0               | 0             |
| Vision                    | DI 1          | 0.14            | 0.10          |
| Weight change             | Induction     | 1.08            | 0.65          |
| Weight change             | Consolidation | 0.78            | 0.80          |
| Weight change             | IM 1          | 0.82            | 0.19          |
| Weight change             | DI 1          | 0.14            | 0.10          |

| <b>Toxicity Site</b>     | <b>Phase</b>  | <b>Female %</b> | <b>Male %</b> |
|--------------------------|---------------|-----------------|---------------|
| Performance <sup>2</sup> | Induction     | 1.33            | 1.06          |
| Performance              | Consolidation | 1.05            | 0.80          |
| Performance              | IM 1          | 0.27            | 0.28          |
| Performance              | DI 1          | 0.57            | 0.59          |

Abbreviations: IM = Interim maintenance, DI = Delayed Intensification; <sup>1</sup> Significant infections include pneumocystis, varicella/zoster, bacteremia/sepsis, central line related infection - bacteremia, meningitis, fungal infection and other infections that required hospitalization; <sup>2</sup>Karnofsky/Lansky scores

**SUPPLEMENTAL DATA**

**Supplemental Table II. Proportion of patients who received supportive care interventions by sex, CCG-1961**

| <b>Supportive Care Interventions</b> | <b>Phase</b>  | <b>Female %</b> | <b>Male %</b> |
|--------------------------------------|---------------|-----------------|---------------|
| Any Type                             | Induction     | 95.66           | 93.70         |
| Any Type                             | Consolidation | 93.73           | 90.84         |
| Any Type                             | IM 1          | 46.26           | 39.65         |
| Any Type                             | DI 1          | 83.40           | 77.13         |
| IV antibiotics                       | Induction     | 75.42           | 69.42         |
| IV antibiotics                       | Consolidation | 62.22           | 60.14         |
| IV antibiotics                       | IM 1          | 30.48           | 26.00         |
| IV antibiotics                       | DI 1          | 57.65           | 51.03         |
| Antifungals                          | Induction     | 13.73           | 8.83          |
| Antifungals                          | Consolidation | 11.37           | 8.01          |
| Antifungals                          | IM 1          | 6.12            | 3.99          |
| Antifungals                          | DI 1          | 11.02           | 7.43          |
| Antivirals                           | Induction     | 6.27            | 4.17          |
| Antivirals                           | Consolidation | 5.62            | 3.83          |
| Antivirals                           | IM 1          | 4.63            | 2.41          |
| Antivirals                           | DI 1          | 5.58            | 4.40          |
| Parenteral nutrition                 | Induction     | 10.24           | 6.62          |
| Parenteral nutrition                 | Consolidation | 12.81           | 8.19          |
| Parenteral nutrition                 | IM 1          | 11.16           | 5.76          |
| Parenteral nutrition                 | DI 1          | 9.44            | 6.35          |
| Blood product                        | Induction     | 91.45           | 87.00         |
| Blood product                        | Consolidation | 90.85           | 85.50         |
| Blood product                        | IM 1          | 25.03           | 17.18         |
| Blood product                        | DI 1          | 70.82           | 59.73         |
| Platelet transfusion                 | Induction     | 73.01           | 70.81         |
| Platelet transfusion                 | Consolidation | 50.00           | 37.63         |
| Platelet transfusion                 | IM 1          | 8.71            | 4.92          |
| Platelet transfusion                 | DI 1          | 43.49           | 34.02         |
| Red blood cell transfusion           | Induction     | 86.14           | 80.54         |
| Red blood cell transfusion           | Consolidation | 88.60           | 84.52         |
| Red blood cell transfusion           | IM 1          | 23.95           | 15.69         |
| Red blood cell transfusion           | DI 1          | 67.53           | 54.35         |
| Hematopoietic growth factor          | Induction     | 4.82            | 2.53          |
| Hematopoietic growth factor          | Consolidation | 8.25            | 6.05          |
| Hematopoietic growth factor          | IM 1          | 5.03            | 1.95          |
| Hematopoietic growth factor          | DI 1          | 10.59           | 6.55          |
| IV analgesic                         | Induction     | 34.46           | 32.79         |
| IV analgesic                         | Consolidation | 21.20           | 17.44         |
| IV analgesic                         | IM 1          | 15.26           | 11.79         |
| IV analgesic                         | DI 1          | 15.88           | 14.08         |

Abbreviations: IM = Interim maintenance, DI = Delayed Intensification; IV = intravenous

**SUPPLEMENTAL DATA**

**Supplemental Table III. Proportion of patients who experienced grade 3, 4 or 5 toxicities, CCG-1991**

| Toxicity Category                   | Phase         | OS/OD/IS/ID |        | Augmented |        |
|-------------------------------------|---------------|-------------|--------|-----------|--------|
|                                     |               | Female %    | Male % | Female %  | Male % |
| Any Grade 3, 4, or 5 toxicities     | Induction     | 42.87       | 37.00  | 68.91     | 61.74  |
| Any Grade 3, 4, or 5 toxicities     | Consolidation | 24.55       | 26.53  | 49.52     | 44.93  |
| Any Grade 3, 4, or 5 toxicities     | IM-I          | 24.79       | 23.48  | 29.70     | 18.66  |
| Any Grade 3, 4, or 5 toxicities     | DI-I          | 38.00       | 31.77  | 45.54     | 35.94  |
| Any Grade 3, 4, or 5 toxicities     | IM-II         | 24.62       | 21.71  | 29.29     | 25.78  |
| Any Grade 3, 4, or 5 toxicities     | DI-II         | 39.52       | 34.78  | 45.45     | 43.09  |
| Significant infections <sup>1</sup> | Induction     | 20.95       | 15.80  | 46.22     | 46.98  |
| Significant infections <sup>1</sup> | Consolidation | 13.74       | 13.91  | 30.48     | 24.64  |
| Significant infections <sup>1</sup> | IM-I          | 9.98        | 8.42   | 13.86     | 7.46   |
| Significant infections <sup>1</sup> | DI-I          | 21.23       | 17.21  | 20.79     | 26.56  |
| Significant infections <sup>1</sup> | IM-II         | 8.93        | 8.37   | 12.12     | 14.06  |
| Significant infections <sup>1</sup> | DI-II         | 21.60       | 21.20  | 26.26     | 16.26  |
| Allergy/Immunology                  | Induction     | 0           | 0.07   | 0         | 0      |
| Allergy/Immunology                  | Consolidation | 0.10        | 0.08   | 0         | 3.62   |
| Allergy/Immunology                  | 3             | 0           | 0.25   | 0.99      | 1.49   |
| Allergy/Immunology                  | 4             | 0.21        | 0.60   | 0         | 0      |
| Allergy/Immunology                  | 5             | 0           | 0      | 0         | 0.78   |
| Allergy/Immunology                  | 6             | 0.22        | 0.72   | 0         | 0.81   |
| Cardiovascular arrhythmias          | Induction     | 0.08        | 0.20   | 0         | 2.01   |
| Cardiovascular arrhythmias          | Consolidation | 0.10        | 0.08   | 0.95      | 0.72   |
| Cardiovascular arrhythmias          | IM-I          | 0.21        | 0      | 0         | 0      |
| Cardiovascular arrhythmias          | DI-I          | 0.42        | 0.09   | 0.99      | 0      |
| Cardiovascular arrhythmias          | IM-II         | 0           | 0      | 1.01      | 0      |
| Cardiovascular arrhythmias          | DI-II         | 0.22        | 0      | 0         | 0.81   |
| Cardiovascular                      | Induction     | 5.05        | 5.60   | 12.61     | 8.72   |
| Cardiovascular                      | Consolidation | 1.21        | 1.14   | 2.86      | 1.45   |
| Cardiovascular                      | IM-I          | 0.63        | 0.67   | 0         | 1.49   |
| Cardiovascular                      | DI-I          | 1.06        | 0.77   | 0.99      | 0      |
| Cardiovascular                      | IM-II         | 0           | 0      | 0         | 0      |
| Cardiovascular                      | DI-II         | 0.86        | 1.27   | 2.02      | 3.25   |
| Coagulation                         | Induction     | 6.68        | 5.66   | 6.72      | 7.38   |
| Coagulation                         | Consolidation | 0.51        | 0.57   | 0         | 2.17   |
| Coagulation                         | IM-I          | 0.21        | 0.08   | 0.99      | 1.49   |
| Coagulation                         | DI-I          | 2.02        | 1.36   | 0.99      | 3.91   |
| Coagulation                         | IM-II         | 0           | 0      | 0         | 0.78   |
| Coagulation                         | DI-II         | 1.94        | 1.45   | 3.03      | 1.63   |
| Constitutional symptoms             | Induction     | 1.22        | 1.25   | 1.68      | 0      |
| Constitutional symptoms             | Consolidation | 0.61        | 1.14   | 0.95      | 0.72   |
| Constitutional symptoms             | IM-I          | 0.32        | 0.25   | 2.97      | 1.49   |
| Constitutional symptoms             | DI-I          | 0.53        | 0.26   | 0.99      | 0      |
| Constitutional symptoms             | IM-II         | 0.33        | 0.09   | 2.02      | 0.78   |
| Constitutional symptoms             | DI-II         | 0.86        | 0.91   | 0         | 0      |
| Dermatology                         | Induction     | 2.28        | 1.97   | 2.52      | 4.03   |
| Dermatology                         | Consolidation | 0.81        | 1.22   | 2.86      | 2.17   |
| Dermatology                         | IM-I          | 0.32        | 0.42   | 0.99      | 0      |
| Dermatology                         | DI-I          | 1.06        | 1.02   | 0.99      | 0.78   |
| Dermatology                         | IM-II         | 0.76        | 0.44   | 0         | 0.78   |

| Toxicity Category | Phase         | OS/OD/IS/ID |        | Augmented |        |
|-------------------|---------------|-------------|--------|-----------|--------|
|                   |               | Female %    | Male % | Female %  | Male % |
| Dermatology       | DI-II         | 1.51        | 1.27   | 1.01      | 0.81   |
| Endocrine         | Induction     | 0           | 0.13   | 0.84      | 1.34   |
| Endocrine         | Consolidation | 0           | 0.08   | 0         | 0      |
| Endocrine         | IM-I          | 0           | 0      | 0         | 0      |
| Endocrine         | DI-I          | 0           | 0      | 0         | 0      |
| Endocrine         | IM-II         | 0           | 0      | 0         | 0.78   |
| Endocrine         | DI-II         | 0           | 0      | 0         | 0      |
| Gastrointestinal  | Induction     | 6.19        | 6.58   | 11.76     | 15.44  |
| Gastrointestinal  | Consolidation | 4.04        | 3.91   | 12.38     | 7.97   |
| Gastrointestinal  | IM-I          | 4.52        | 3.54   | 7.92      | 4.48   |
| Gastrointestinal  | DI-I          | 9.02        | 5.62   | 7.92      | 7.03   |
| Gastrointestinal  | IM-II         | 5.34        | 3.92   | 13.13     | 3.91   |
| Gastrointestinal  | DI-II         | 7.34        | 8.88   | 10.10     | 8.13   |
| Hemorrhage        | Induction     | 1.06        | 0.92   | 4.20      | 3.36   |
| Hemorrhage        | Consolidation | 0.40        | 0.33   | 3.81      | 1.45   |
| Hemorrhage        | IM-I          | 0           | 0.08   | 0.99      | 0      |
| Hemorrhage        | DI-I          | 0           | 0.60   | 0         | 2.34   |
| Hemorrhage        | IM-II         | 0           | 0      | 0         | 0      |
| Hemorrhage        | DI-II         | 0.22        | 0.54   | 6.06      | 3.25   |
| Hepatic           | Induction     | 9.13        | 6.91   | 22.69     | 12.75  |
| Hepatic           | Consolidation | 10.10       | 11.64  | 16.19     | 11.59  |
| Hepatic           | IM-I          | 12.29       | 13.64  | 11.88     | 4.48   |
| Hepatic           | DI-I          | 4.78        | 5.11   | 12.87     | 6.25   |
| Hepatic           | IM-II         | 11.87       | 11.60  | 14.14     | 10.16  |
| Hepatic           | DI-II         | 7.56        | 4.35   | 14.14     | 12.20  |
| Metabolic         | Induction     | 12.39       | 9.22   | 28.57     | 22.82  |
| Metabolic         | Consolidation | 1.41        | 1.95   | 6.67      | 3.62   |
| Metabolic         | IM-I          | 0.95        | 0.51   | 1.98      | 2.99   |
| Metabolic         | DI-I          | 4.56        | 2.39   | 1.98      | 3.13   |
| Metabolic         | IM-II         | 1.53        | 0.61   | 4.04      | 3.91   |
| Metabolic         | DI-II         | 4.54        | 3.26   | 2.02      | 5.69   |
| Musculoskeletal   | Induction     | 0.90        | 0.79   | 0.84      | 0.67   |
| Musculoskeletal   | Consolidation | 0.61        | 0.41   | 0.95      | 0.72   |
| Musculoskeletal   | IM-I          | 0.11        | 0.25   | 0         | 0      |
| Musculoskeletal   | DI-I          | 0.11        | 0.17   | 0         | 0      |
| Musculoskeletal   | IM-II         | 0.11        | 0      | 0         | 0      |
| Musculoskeletal   | DI-II         | 0           | 0      | 0         | 0      |
| Neurology         | Induction     | 0.90        | 0.46   | 0         | 0.67   |
| Neurology         | Consolidation | 0.40        | 0.33   | 0.95      | 0      |
| Neurology         | IM-I          | 0           | 0.08   | 1.98      | 0      |
| Neurology         | DI-I          | 0.42        | 0.17   | 0         | 0      |
| Neurology         | IM-II         | 0.22        | 0.09   | 0         | 0      |
| Neurology         | DI-II         | 0.22        | 0.54   | 0         | 0      |
| Ocular            | Induction     | 0.16        | 0      | 0         | 0      |
| Ocular            | Consolidation | 0.10        | 0      | 0         | 0      |
| Ocular            | IM-I          | 0.11        | 0.08   | 0         | 0      |
| Ocular            | DI-I          | 0.11        | 0.09   | 0         | 0.78   |
| Ocular            | IM-II         | 0           | 0.09   | 1.01      | 0.78   |
| Ocular            | DI-II         | 0           | 0      | 1.01      | 0      |
| Pain              | Induction     | 4.65        | 3.55   | 8.40      | 4.70   |
| Pain              | Consolidation | 2.22        | 2.03   | 2.86      | 1.45   |
| Pain              | IM-I          | 0.21        | 0.59   | 1.98      | 2.24   |



| Toxicity Category   | Phase         | OS/OD/IS/ID |        | Augmented |        |
|---------------------|---------------|-------------|--------|-----------|--------|
|                     |               | Female %    | Male % | Female %  | Male % |
| Pain                | DI-I          | 3.29        | 1.70   | 0.99      | 3.13   |
| Pain                | IM-II         | 0.98        | 0.52   | 1.01      | 0.78   |
| Pain                | DI-II         | 4.10        | 2.72   | 5.05      | 0.81   |
| Pulmonary           | Induction     | 1.14        | 1.51   | 5.04      | 4.70   |
| Pulmonary           | Consolidation | 0.51        | 0.98   | 0.95      | 1.45   |
| Pulmonary           | IM-I          | 0.63        | 0.51   | 0         | 0.75   |
| Pulmonary           | DI-I          | 1.27        | 0.43   | 0         | 1.56   |
| Pulmonary           | IM-II         | 0.54        | 0.17   | 0         | 0      |
| Pulmonary           | DI-II         | 1.08        | 0.36   | 5.05      | 1.63   |
| Renal/Genitourinary | Induction     | 0.98        | 0.46   | 0         | 2.01   |
| Renal/Genitourinary | Consolidation | 0.51        | 0.24   | 0         | 0      |
| Renal/Genitourinary | IM-I          | 0.11        | 0      | 0         | 0      |
| Renal/Genitourinary | DI-I          | 0.21        | 0.09   | 0         | 0      |
| Renal/Genitourinary | IM-II         | 0.11        | 0      | 0         | 0      |
| Renal/Genitourinary | DI-II         | 0.22        | 0.18   | 0         | 0.81   |

Abbreviations: IM = Interim maintenance, DI = Delayed Intensification; <sup>1</sup> Significant infections include pneumocystis, varicella/zoster, bacteremia, fungal infection and other infections that required hospitalization.
